# Supplementary material
Source: MDPI journal article supplement (https://www.mdpi.com/1424-2818/11/9/162)
Supplement: s1 [file s1]

**LIST OF THE STATUSES OF GORSE IDENTIFIED IN 14 COUNTRIES WITH A SYSTEMATIC WEB SURVEY**

Number of documents or websites corresponding to each status for the 14 countries (one table per country, presented in alphabetic order).

Data are the result of a systematic search carried out on the 3 google search engines (Google, Google Scholar, and Google News) in August-October 2016.

**Argentina**

|                         | Invasive | Agronomic pest | Useful (economy) | Useful (medical) | Useful (environment) | Landscaping |
|-------------------------|----------|----------------|------------------|------------------|----------------------|-------------|
| Scientific publications | 1        |                | 1                | 1                |                      |             |
| Grey literature         | 2        | 2              | 1                |                  |                      |             |
| Public institutions     |          | 1              | 2                |                  |                      |             |
| Private sites, blogs    |          |                | 1                |                  |                      | 1           |
| Newspapers              |          |                |                  |                  |                      |             |
| Regulatory texts        |          |                |                  |                  |                      |             |
| Commercial sites        |          | 1              |                  |                  |                      |             |
| Ouvrage grand public    |          |                |                  | 1                |                      |             |

Bolivia

|                            | Invasive | Agronomic<br>pest | Useful<br>(economy) | Useful<br>(medical) | Useful<br>(environment) | Landscaping |
|----------------------------|----------|-------------------|---------------------|---------------------|-------------------------|-------------|
| Scientific<br>publications |          |                   |                     |                     |                         |             |
| Grey<br>litterature        | 1        |                   |                     |                     |                         |             |
| Public<br>institutions     |          |                   | 2                   |                     |                         |             |
| Private sites,<br>blogs    |          |                   |                     |                     |                         |             |
| Newspapers                 |          |                   |                     |                     |                         |             |
| Regulatory<br>texts        |          |                   |                     |                     |                         |             |
| Commercial<br>sites        |          |                   |                     |                     |                         |             |

Brazil

|                            | Invasive | Agronomic<br>pest | Useful<br>(economy) | Useful<br>(medical) | Useful<br>(environment) | Landscaping |
|----------------------------|----------|-------------------|---------------------|---------------------|-------------------------|-------------|
| Scientific<br>publications | 3        |                   |                     | 2                   |                         |             |
| Grey<br>litterature        | 7        | 1                 |                     |                     |                         |             |
| Public<br>institutions     | 6        | 2                 | 3                   |                     |                         |             |
| Private sites,<br>blogs    | 3        | 1                 |                     | 1                   |                         |             |
| Newspapers                 | 2        | 2                 |                     |                     |                         |             |
| Regulatory<br>texts        |          |                   |                     |                     |                         |             |
| Commercial<br>sites        | 1        | 1                 |                     | 1                   |                         |             |

Chile

|                            | Invasive | Agronomic<br>pest | Useful<br>(economy) | Useful<br>(medical) | Useful<br>(environment) | Landscaping |
|----------------------------|----------|-------------------|---------------------|---------------------|-------------------------|-------------|
| Scientific<br>publications | 7        | 21                | 2                   |                     |                         | 1           |
| Grey<br>litterature        |          | 6                 | 1                   |                     | 1                       |             |
| Public<br>institutions     | 5        | 6                 | 2                   |                     |                         |             |
| Private sites,<br>blogs    | 1        | 3                 | 1                   |                     |                         | 2           |
| Newspapers                 | 2        | 4                 |                     |                     |                         |             |
| Regulatory<br>texts        |          |                   |                     |                     |                         |             |
| Commercial<br>sites        |          |                   | 1                   |                     |                         |             |

Colombia

|                            | Invasive | Agronomic<br>pest | Useful<br>(economy) | Useful<br>(medical) | Useful<br>(environment) | Landscaping |
|----------------------------|----------|-------------------|---------------------|---------------------|-------------------------|-------------|
| Scientific<br>publications | 12       |                   | 2                   |                     |                         |             |
| Grey<br>litterature        | 15       |                   |                     |                     |                         |             |
| Public<br>institutions     | 6        |                   |                     |                     |                         |             |
| Private sites,<br>blogs... | 1        |                   | 1                   |                     | 1                       | 2           |
| Newspapers                 | 15       |                   |                     |                     |                         | 1           |
| Regulatory<br>texts        |          |                   |                     |                     |                         |             |
| Commercial<br>sites        | 1        |                   |                     | 1                   |                         |             |

Costa Rica

|                            | Invasive | Agronomic<br>pest | Useful<br>(economy) | Useful<br>(medical) | Useful<br>(environment) | Landscaping |
|----------------------------|----------|-------------------|---------------------|---------------------|-------------------------|-------------|
| Scientific<br>publications | 3        |                   |                     | 4                   |                         | 1           |
| Grey<br>litterature        | 4        |                   |                     |                     |                         | 2           |
| Public<br>institutions     |          |                   |                     |                     |                         |             |
| Private sites,<br>blogs... |          |                   |                     |                     |                         | 2           |
| Newspapers                 |          |                   |                     |                     |                         |             |
| Regulatory<br>texts        |          |                   |                     |                     |                         |             |
| Commercial<br>sites        |          |                   |                     |                     |                         | 2           |
| Encyclopedia               |          | 1                 |                     |                     |                         |             |

Ecuador

|                            | Invasive | Agronomic<br>pest | Useful<br>(economy) | Useful<br>(medical) | Useful<br>(environment) | Landscaping |
|----------------------------|----------|-------------------|---------------------|---------------------|-------------------------|-------------|
| Scientific<br>publications |          |                   |                     | 4                   |                         | 1           |
| Grey<br>litterature        | 2        |                   |                     |                     |                         | 2           |
| Public<br>institutions     | 1        |                   |                     |                     |                         | 2           |
| Private sites,<br>blogs... |          |                   |                     | 1                   |                         |             |
| Newspapers                 |          |                   |                     |                     |                         |             |
| Regulatory<br>texts        |          |                   |                     |                     |                         |             |
| Commercial<br>sites        |          |                   |                     |                     |                         |             |

Falkland

|                            | Invasive | Agronomic<br>pest | Useful<br>(economy) | Useful<br>(medical) | Useful<br>(environment) | Landscaping | Exotic |
|----------------------------|----------|-------------------|---------------------|---------------------|-------------------------|-------------|--------|
| Scientific<br>publications | 1        |                   | 2                   |                     | 3                       | 1           | 2      |
| Grey<br>litterature        | 7        |                   |                     |                     |                         |             |        |
| Public<br>institutions     | 5        | 1                 |                     |                     |                         | 1           |        |
| Private sites,<br>blogs... |          |                   |                     |                     |                         | 2           |        |
| Newspapers                 |          |                   |                     |                     |                         |             |        |
| Regulatory<br>texts        |          |                   |                     |                     |                         |             |        |
| Commercial<br>sites        |          |                   |                     |                     |                         | 6           |        |
| Book for<br>general public |          |                   |                     |                     |                         | 1           |        |

La Réunion

|                            | Invasive | Agronomic<br>pest | Useful<br>(economy) | Useful<br>(medical) | Useful<br>(environment) | Landscaping |
|----------------------------|----------|-------------------|---------------------|---------------------|-------------------------|-------------|
| Scientific<br>publications | 12       |                   |                     | 5                   |                         |             |
| Grey<br>litterature        | 12       | 5                 | 1                   |                     | 1                       | 1           |
| Public<br>institutions     | 3        |                   |                     |                     | 2                       | 1           |
| Private sites,<br>blogs... | 4        | 3                 |                     |                     |                         | 3           |
| Newspapers                 | 7        |                   | 3                   |                     |                         | 1           |
| Regulatory<br>texts        |          |                   |                     |                     |                         |             |
| Commercial<br>sites        |          |                   |                     |                     |                         |             |

Canaria

|                            | Invasive | Agronomic<br>pest | Useful<br>(economy) | Useful<br>(medical) | Useful<br>(environment) | Landscaping | Native |
|----------------------------|----------|-------------------|---------------------|---------------------|-------------------------|-------------|--------|
| Scientific<br>publications | 4        |                   |                     |                     |                         |             |        |
| Grey<br>litterature        | 4        | 1                 |                     |                     |                         |             |        |
| Public<br>institutions     | 5        |                   |                     |                     |                         |             |        |
| Private sites,<br>blogs... | 2        |                   |                     |                     |                         | 2           |        |
| Newspapers                 | 3        |                   |                     |                     |                         |             |        |
| Regulatory<br>texts        | 1        |                   |                     |                     |                         |             |        |
| Commercial<br>sites        |          |                   |                     |                     |                         |             |        |
| Book for<br>general public |          |                   |                     |                     |                         | 2           | 1      |

Mexico

|                            | Invasive | Agronomic<br>pest | Useful<br>(economy) | Useful<br>(medical) | Useful<br>(environment) | Landscaping |
|----------------------------|----------|-------------------|---------------------|---------------------|-------------------------|-------------|
| Scientific<br>publications |          |                   | 1                   | 5                   |                         |             |
| Grey<br>litterature        | 1        |                   |                     |                     |                         | 1           |
| Public<br>institutions     |          |                   |                     |                     |                         |             |
| Private sites,<br>blogs... |          |                   |                     |                     |                         |             |
| Newspapers                 |          |                   |                     |                     |                         |             |
| Regulatory<br>texts        |          | 1                 |                     |                     |                         |             |
| Commercial<br>sites        |          |                   |                     |                     |                         |             |

# New Zealand

|                            | Invasive | Agronomic<br>pest | Useful<br>(economy) | Useful<br>(medical) | Useful<br>(environment) | Landscaping |
|----------------------------|----------|-------------------|---------------------|---------------------|-------------------------|-------------|
| Scientific<br>publications | 5        | 10                | 1                   | 1                   | 5                       | 8           |
| Grey<br>litterature        |          | 2                 |                     |                     | 1                       | 1           |
| Public<br>institutions     | 1        | 7                 |                     |                     | 3                       | 2           |
| Private sites,<br>blogs... |          |                   |                     |                     |                         | 2           |
| Newspapers                 | 2        | 7                 | 1                   |                     |                         | 4           |
| Regulatory<br>texts        |          |                   |                     |                     |                         |             |
| Commercial<br>sites        |          | 2                 |                     |                     | 1                       |             |
| Encyclopedia               | 1        | 1                 | 1                   | 1                   | 1                       |             |

Peru

|                            | Invasive | Agronomic<br>pest | Useful<br>(economy) | Useful<br>(medical) | Useful<br>(environment) | Landscaping |
|----------------------------|----------|-------------------|---------------------|---------------------|-------------------------|-------------|
| Scientific<br>publications |          |                   |                     | 6                   |                         |             |
| Grey<br>litterature        |          |                   |                     |                     |                         | 2           |
| Public<br>institutions     |          |                   |                     |                     |                         |             |
| Private sites,<br>blogs... |          |                   | 1                   |                     |                         | 1           |
| Newspapers                 |          |                   |                     |                     |                         |             |
| Regulatory<br>texts        |          |                   |                     |                     |                         |             |
| Commercial<br>sites        |          |                   |                     | 8                   |                         |             |

Uruguay

|                            | Invasive | Agronomic<br>pest | Useful<br>(economy) | Useful<br>(medical) | Useful<br>(environment) | Landscaping |
|----------------------------|----------|-------------------|---------------------|---------------------|-------------------------|-------------|
| Scientific<br>publications | 1        | 2                 | 1                   | 1                   |                         | 1           |
| Grey<br>litterature        | 12       | 10                |                     |                     |                         |             |
| Public<br>institutions     | 2        | 3                 |                     |                     |                         |             |
| Private sites,<br>blogs... |          |                   |                     |                     |                         |             |
| Newspapers                 |          |                   |                     |                     |                         |             |
| Regulatory<br>texts        |          |                   |                     |                     |                         |             |
| Commercial<br>sites        |          | 1                 |                     |                     |                         |             |
